# Supplementary material for: Association Between Chronic Renal Disease and the Risk of Glaucoma Development: A 12-year Nationwide Cohort Study
Source: PubMed Central journal article supplement (PMC8164364; doi:10.1167/iovs.62.6.27), 2021-05-27
Supplement: iovs-62-6-27_s001.pdf [file iovs-62-6-27_s001.pdf]

**SUPPLEMENTARY TABLE.** Cumulative Incidence (%) of Glaucoma during the Follow-Up Period of 11 Years

|                              | <b>N</b> | <b>Event</b> | <b>Cumulative incidence (%) at 1 year</b> | <b>Cumulative incidence (%) at 2 years</b> | <b>Cumulative incidence (%) at 3 years</b> | <b>Cumulative incidence (%) at 4 years</b> | <b>Cumulative incidence (%) at 5 years</b> | <b>Cumulative incidence (%) at 6 years</b> | <b>Cumulative incidence (%) at 7 years</b> | <b>Cumulative incidence (%) at 8 years</b> | <b>Cumulative incidence (%) at 9 years</b> | <b>Cumulative incidence (%) at 10 years</b> | <b>Cumulative incidence (%) at 11 years</b> |
|------------------------------|----------|--------------|-------------------------------------------|--------------------------------------------|--------------------------------------------|--------------------------------------------|--------------------------------------------|--------------------------------------------|--------------------------------------------|--------------------------------------------|--------------------------------------------|---------------------------------------------|---------------------------------------------|
| <b>Total</b>                 | 21,611   | 652          | 0.36<br>(0.28 - 0.44)                     | 0.83<br>(0.70 - 0.95)                      | 1.30<br>(1.15 - 1.46)                      | 1.64<br>(1.47 - 1.82)                      | 2.10<br>(1.90 - 2.30)                      | 2.42<br>(2.21 - 2.64)                      | 2.79<br>(2.56 - 3.02)                      | 3.19<br>(2.93 - 3.44)                      | 3.52<br>(3.24 - 3.81)                      | 3.97<br>(3.64 - 4.31)                       | 4.19<br>(3.80 - 4.58)                       |
| <b>Group</b>                 |          |              |                                           |                                            |                                            |                                            |                                            |                                            |                                            |                                            |                                            |                                             |                                             |
| <b>Control</b>               | 17,971   | 495          | 0.27<br>(0.19 - 0.35)                     | 0.64<br>(0.52 - 0.75)                      | 1.06<br>(0.91 - 1.21)                      | 1.38<br>(1.21 - 1.56)                      | 1.83<br>(1.63 - 2.03)                      | 2.09<br>(1.88 - 2.31)                      | 2.42<br>(2.19 - 2.66)                      | 2.80<br>(2.54 - 3.06)                      | 3.16<br>(2.87 - 3.46)                      | 3.54<br>(3.20 - 3.89)                       | 3.79<br>(3.38 - 4.20)                       |
| <b>Chronic Renal disease</b> | 3,640    | 157          | 0.86<br>(0.55 - 1.17)                     | 1.87<br>(1.40 - 2.34)                      | 2.64<br>(2.07 - 3.20)                      | 3.11<br>(2.50 - 3.73)                      | 3.65<br>(2.97 - 4.33)                      | 4.33<br>(3.59 - 5.08)                      | 4.97<br>(4.16 - 5.78)                      | 5.49<br>(4.61 - 6.36)                      | 5.63<br>(4.73 - 6.53)                      | 6.58<br>(5.41 - 7.76)                       | 6.58<br>(5.41 - 7.76)                       |

Kaplan-Meier analysis

95% confidence interval is indicated in ( ).
